# Supplementary material
Source: publisher site journal article supplement (https://www.spandidos-publications.com/3195/downloadSupplementary)
Supplement: Supplementary file 1 [file downloadSupplementary]

## Sheet: average expression
Table SIII. Average expression of differentially expressed miRNAs.
miRNA_name	average (0h)	average (12h)	average (24h)	fc (0h_vs_12h)	fc (0h_vs_24h)	P-value (0h_vs_12h)	P-value (0h_vs_24h)	Regulation
rno-miR-133b-5p	28.7349	0.0747007	0.109421	384.667	262.609	1.3886e-11	2.22236e-12	Down
rno-miR-27a-5p	228.79	2.70041	2.15298	84.7241	106.267	3.43242e-74	2.16962e-98	Down
rno-miR-92a-1-5p	351.181	12.2735	6.91236	28.6129	50.8047	2.87484e-70	7.1793e-118	Down
rno-miR-702-5p	42.319	2.40989	1.0614	17.5606	39.8708	9.37232e-29	8.77389e-33	Down
rno-miR-181b-1-3p	10.8424	0.638445	0.6443	16.9824	16.8281	1.48878e-08	5.74419e-08	Down
rno-miR-222-5p	57.5136	4.49812	4.17419	12.7861	13.7784	1.40305e-28	2.29876e-29	Down
rno-miR-128-1-5p	83.4639	8.22916	7.36552	10.1425	11.3317	2.2026e-33	3.17446e-24	Down
rno-let-7e-3p	28.6115	3.77047	7.03488	7.5883	4.06709	3.37826e-08	1.32103e-08	Down
rno-let-7c-1-3p	27.3607	3.6522	3.14138	7.49157	8.70977	1.76949e-14	2.35995e-15	Down
rno-miR-125b-1-3p	1120.58	153.525	174.481	7.29901	6.42237	1.18019e-29	6.9738e-27	Down
rno-miR-152-5p	1026.59	186.718	186.386	5.49811	5.5079	1.01063e-43	6.64598e-52	Down
rno-let-7b-3p	34.0321	7.02906	6.3539	4.84163	5.35609	2.94241e-13	2.62255e-07	Down
rno-miR-29b-1-5p	32.2899	6.78491	7.07315	4.75908	4.56514	1.01508e-11	9.90906e-11	Down
rno-miR-671	134.503	29.6099	28.4707	4.5425	4.72426	7.26796e-18	3.2031e-23	Down
rno-miR-195-3p	15.8032	3.82164	4.23875	4.13519	3.72827	4.25769e-07	2.43914e-05	Down
rno-miR-181a-1-3p	1396.31	383.626	326.032	3.63977	4.28275	1.09975e-20	1.4141e-25	Down
rno-miR-148b-5p	216.025	59.8009	53.2343	3.6124	4.058	0.231301	0.0266331	Down
rno-miR-34a-3p	10.9616	3.05455	1.58626	3.58861	6.91037	0.000266572	9.91693e-08	Down
rno-miR-26b-3p	52.402	15.311	20.6531	3.4225	2.53725	0.0225286	0.162826	Down
rno-miR-206-3p	126.971	39.6914	23.9157	3.19896	5.30913	9.81463e-12	1.0918e-24	Down
rno-miR-421-5p	63.5895	20.1337	11.1396	3.15836	5.70843	1.0321e-07	4.55965e-14	Down
rno-miR-30d-3p	106.773	34.1285	21.3671	3.12856	4.99709	0.0162339	0.00265278	Down
rno-miR-3102	49.9688	17.1611	9.63384	2.91174	5.1868	0.0994188	0.0208011	Down
rno-miR-143-5p	92.7016	32.4641	36.5617	2.85551	2.53548	0.0260265	0.0651941	Down
rno-miR-100-3p	29.5419	10.7981	10.2837	2.73583	2.8727	8.77967e-06	1.36441e-05	Down
rno-miR-30c-2-3p	93.3487	35.0211	33.6659	2.6655	2.7728	1.50727e-07	1.42414e-06	Down
rno-miR-185-3p	10.0394	3.81439	5.27298	2.63199	1.90394	0.0182435	0.233771	Down
rno-miR-125a-3p	51.3567	19.7522	18.0236	2.60005	2.84941	3.95836e-06	1.23201e-07	Down
rno-miR-27b-5p	86.2476	34.6909	34.0462	2.48618	2.53325	1.01373e-06	2.86428e-06	Down
rno-miR-503-3p	110.527	44.5261	23.927	2.48231	4.61935	1.90354e-05	0.000222212	Down
rno-miR-191a-3p	15.6088	6.3104	5.34827	2.47351	2.91848	0.00281844	0.00091562	Down
rno-miR-3585-5p	10.1127	4.29411	0.168618	2.35503	59.9744	0.442133	4.73273e-09	Down
rno-miR-188-5p	969.999	434.725	342.316	2.23129	2.83364	9.41441e-07	5.79566e-10	Down
rno-miR-125b-2-3p	1509.21	681.335	689.342	2.21507	2.18934	3.50221e-09	6.48557e-07	Down
rno-miR-99a-3p	81.0649	36.8888	31.7047	2.19755	2.55688	1.22008e-05	8.97622e-06	Down
rno-miR-130a-5p	25.0373	11.7928	9.89982	2.1231	2.52907	0.0185228	0.019578	Down
rno-let-7a-1-3p	38.0155	18.1831	16.358	2.0907	2.32396	0.00639301	0.006381	Down
rno-miR-7a-1-3p	25.1633	12.0725	6.015	2.08435	4.18342	0.0450361	1.71426e-05	Down
rno-miR-218a-5p	805.759	386.64	373.722	2.084	2.15604	0.000811944	0.00705881	Down
rno-miR-374-3p	142.349	70.4917	38.4823	2.01937	3.69907	0.00514568	0.0189589	Down
rno-let-7c-2-3p	38.0076	19.1279	14.8957	1.98702	2.55158	0.00199439	6.42738e-05	Down
rno-miR-378a-5p	40.6955	20.6183	22.4296	1.97375	1.81437	0.0126005	0.0377901	Down
rno-miR-503-5p	52.0024	26.3863	20.1041	1.97081	2.58665	0.00248834	0.00013604	Down
rno-miR-466b-5p	50.0974	25.4888	20.8866	1.96547	2.39854	0.00105504	0.00116076	Down
rno-miR-423-3p	722.866	380.336	325.945	1.9006	2.21776	0.0133813	0.00896045	Down
rno-miR-29b-3p	139.034	74.3062	74.9501	1.8711	1.85502	0.00175603	0.240035	Down
rno-miR-1249	25.0215	13.7469	13.3612	1.82016	1.8727	0.0263319	0.131033	Down
rno-miR-33-5p	48.5969	26.9046	21.0113	1.80627	2.3129	0.0432986	0.00759487	Down
rno-miR-466c-5p	30.0173	16.6641	14.2074	1.80132	2.1128	0.0238263	0.0161875	Down
rno-miR-542-3p	2178.11	1209.84	716.304	1.80033	3.04077	0.023685	8.79213e-07	Down
rno-miR-181a-2-3p	22.1941	12.371	8.79066	1.79404	2.52474	0.046119	0.0113173	Down
rno-miR-7a-5p	233.262	130.16	108.954	1.79211	2.14091	0.0358521	0.0296561	Down
rno-miR-18a-3p	31.3549	17.9182	22.3741	1.74989	1.40139	0.0431339	0.839451	Down
rno-miR-483-3p	27.2495	15.613	13.1735	1.74531	2.0685	0.0579094	0.0198424	Down
rno-miR-10b-3p	36.2966	21.0936	13.8077	1.72074	2.62872	0.160336	0.0343651	Down
rno-miR-449a-5p	66.3757	38.7059	29.3349	1.71487	2.26269	0.130731	0.0268137	Down
rno-miR-17-5p	698.227	416.205	319.663	1.6776	2.18426	0.270392	0.00863131	Down
rno-miR-219a-1-3p	34.1389	20.3498	22.3384	1.6776	1.52826	0.0415372	0.525374	Down
rno-miR-133b-3p	114.277	72.0992	49.9475	1.58499	2.28793	0.0584402	7.00081e-05	Down
rno-miR-378a-3p	9015.62	5767.56	4798.6	1.56316	1.8788	0.025518	0.00517975	Down
rno-miR-146b-5p	481.029	308.622	242.847	1.55864	1.98079	0.240037	0.038984	Down
rno-miR-101a-3p	2102.47	1387.69	1167.96	1.51509	1.80012	0.0679525	0.0196696	Down
rno-miR-34b-5p	858.875	601.078	481.043	1.42889	1.78544	0.138009	0.00506398	Down
rno-let-7a-5p	9151.75	6569.92	5423.72	1.39298	1.68736	0.219445	0.036941	Down
rno-let-7g-5p	3043.11	2281.78	1864.19	1.33365	1.6324	0.383072	0.0377516	Down
rno-miR-324-5p	88.8723	67.0597	48.3214	1.32527	1.83919	0.483398	0.0255117	Down
rno-miR-598-3p	109.18	91.6051	61.8897	1.19185	1.7641	0.935063	0.04444	Down
rno-miR-455-3p	72.2766	83.4448	115.434	0.86616	0.626128	0.158915	1.81524e-05	Up
rno-miR-92b-3p	131.593	165.65	228.811	0.794405	0.575117	0.0114406	1.47814e-06	Up
rno-miR-222-3p	1154.99	1479.76	2292.12	0.780523	0.503895	1.58306e-05	1.09322e-30	Up
rno-miR-155-5p	493.521	752.103	885.879	0.656188	0.557098	2.23509e-07	1.43758e-17	Up
rno-miR-298-3p	22.3274	34.0832	24.9733	0.655086	0.894051	0.000452079	0.174245	Up
rno-miR-351-5p	36492.9	56048.4	71931.1	0.651097	0.507332	2.86804e-07	3.72451e-17	Up
rno-miR-664-3p	29.6751	46.339	43.4221	0.640392	0.683411	0.0014506	2.77677e-05	Up
rno-miR-145-5p	2265.33	3668.82	3299.82	0.617455	0.686502	0.003034	2.30033e-05	Up
rno-miR-107-3p	171.812	423.085	659.094	0.406093	0.260679	0.168085	0.000191758	Up
Average value of three samples at each time point was presented. Value of fold-change was ratio of expression value at 0h time point to expression value 12 or 24h time point. miR/miRNA, microRNA; fc, fold-change; Down, downregulation; Up, upregulation.
